# Supplementary material
Source: MDPI journal article supplement (https://www.mdpi.com/2305-7084/7/2/18)
Supplement: s1 [file s1]

Article, Review

# Degradation Studies of Air-Exposed Black Phosphorous and Black Arsenic Phosphorous

Usman O. Abu <sup>1</sup>, Dinushika Vithanage<sup>2</sup>, Ashan Vitharana<sup>2</sup>, Jacek B. Jasinski<sup>1,\*</sup> and Gamini Sumanasekera<sup>2,\*</sup>

<sup>1</sup> Conn Center for Renewable Energy Research, University of Louisville, KY 40292, USA; usman.abu@louisville.edu, jacek.jasinski@louisville.edu

<sup>2</sup> Department of Physics & Astronomy, University of Louisville, KY 40292, USA; ahangamavithanagedi-nushika.vithanage@louisville.edu, ashan.vitharana@louisville.edu, gamini.sumanasekera@louisville.edu

\* Correspondence: jacek.jasinski@louisville.edu, gamini.sumanasekera@louisville.edu

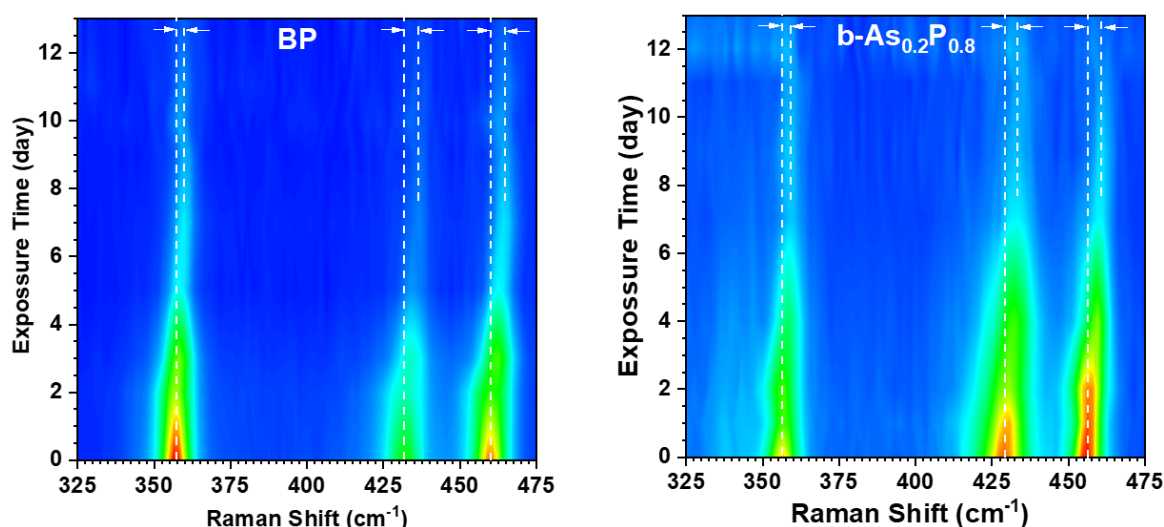

Figure S1: Degradation color maps highlighting the vanishing Raman modes of BP and  $\text{As}_{0.2}\text{P}_{0.8}$  as time evolves. (a) BP (b)  $\text{As}_{0.2}\text{P}_{0.8}$ .

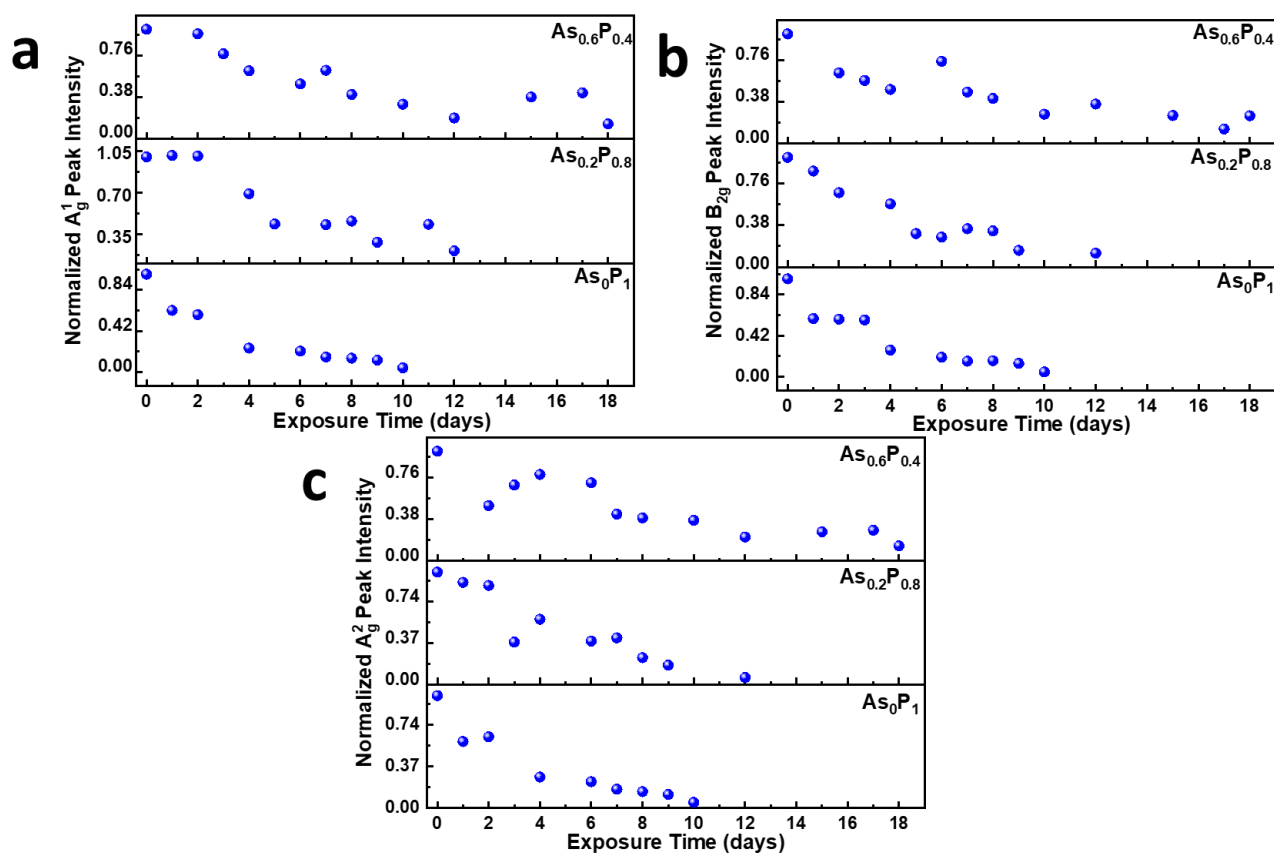

Figure S2: Degradation of the peak intensities of P – P Raman vibration modes. (a)  $A_{1g}^1$  (b)  $B_{2g}$  (c)  $A_{1g}^2$ .

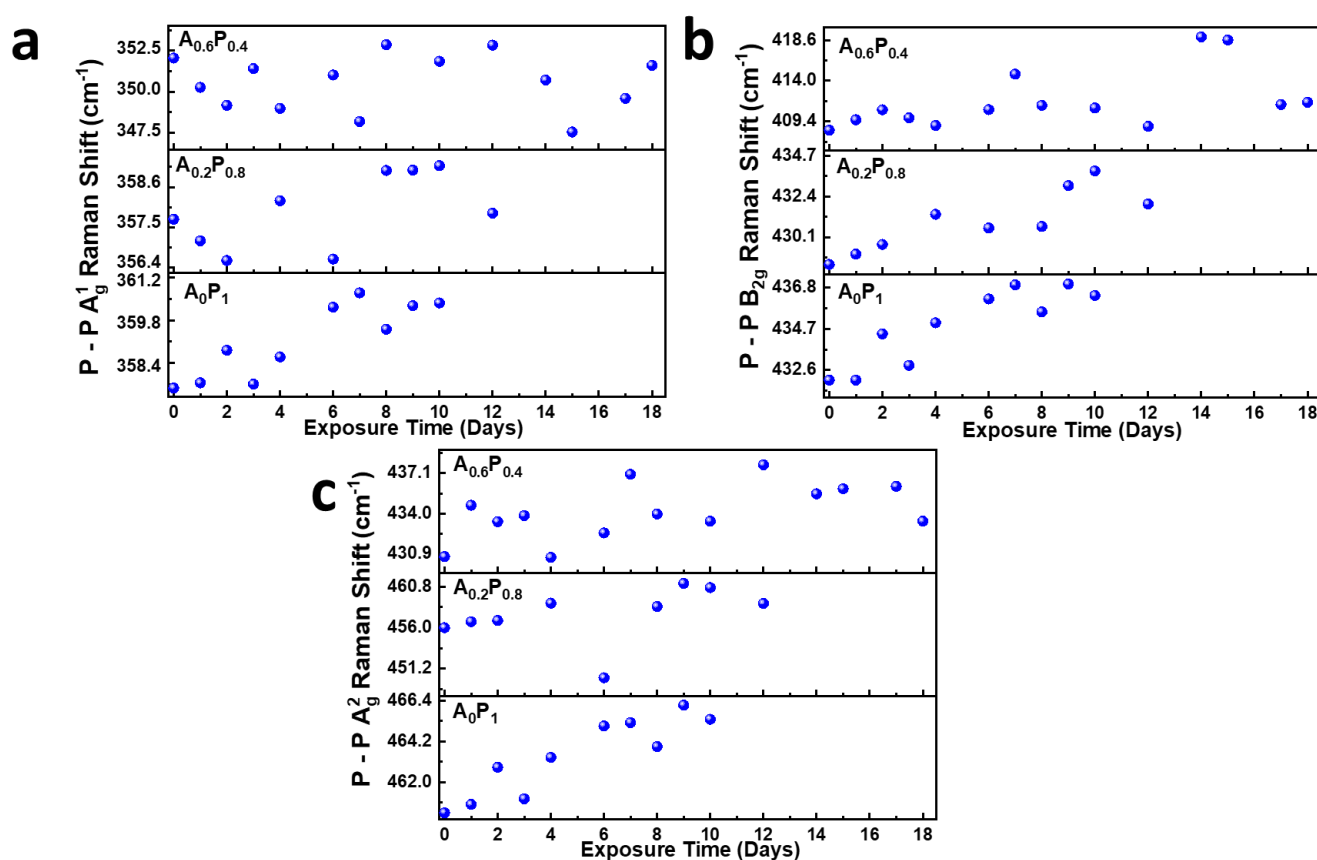Figure S3: Peak positions for P – P Raman vibration modes. (a)  $A_g^1$  (b)  $B_{2g}$  (c)  $A_g^2$ .

Table S1: Decay function parameters for Raman spectra.

| Sample            | Characteristic Decay Time, $\tau$ (days) |
|-------------------|------------------------------------------|
| BP                | $4 \pm 1$                                |
| $As_{0.2}P_{0.8}$ | $5 \pm 1$                                |
| $As_{0.6}P_{0.4}$ | $11 \pm 3$                               |

Table S2: Growth function parameters for normalized thermoelectric power (TEP).

| Sample            | Characteristic Growth Time, $\tau$ (min) |
|-------------------|------------------------------------------|
| BP                | $166 \pm 4$                              |
| $As_{0.4}P_{0.6}$ | $226 \pm 12$                             |

Table S3: Decay function parameters for normalized resistance.

| Sample            | Characteristic Decay Time $\tau$ , min |
|-------------------|----------------------------------------|
| BP                | $40 \pm 7$                             |
| $As_{0.4}P_{0.6}$ | $176 \pm 21$                           |

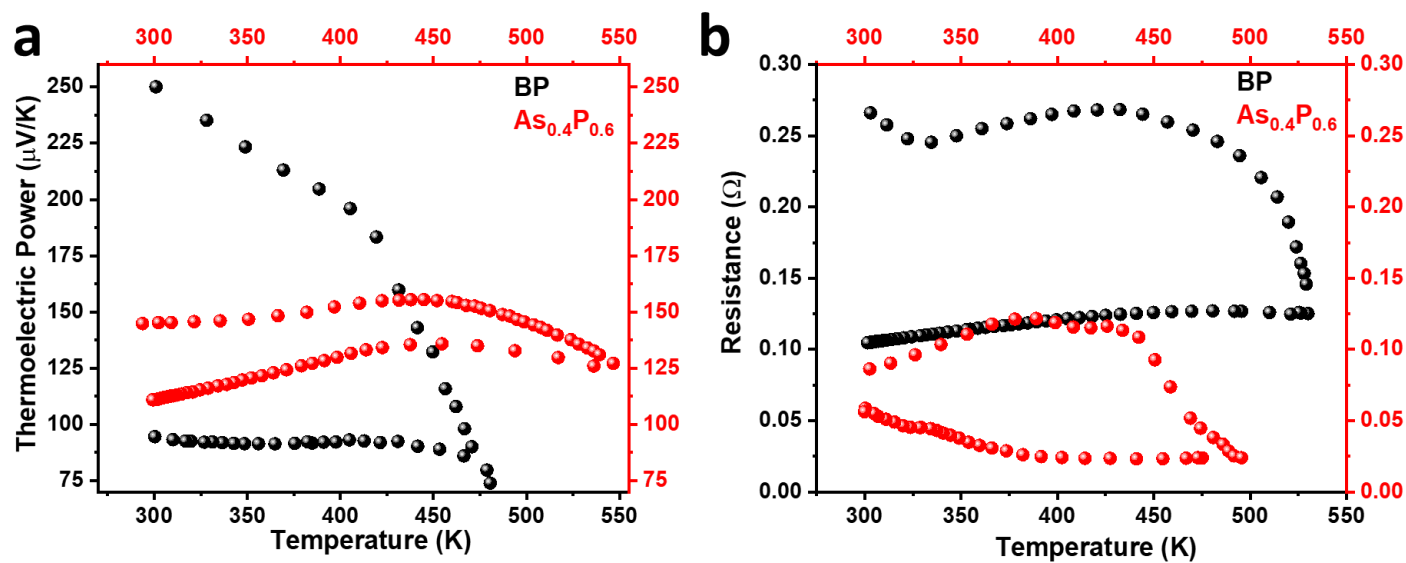

Figure S4: Response of the electrical transport properties of BP and  $\text{As}_{0.4}\text{P}_{0.6}$  to heating and cooling. (a) TEP and (b) resistance.
